# Supplementary material for: Distinct breast milk microbiota, cytokine, and adipokine profiles are associated with infant growth at 12 months: anin vitrohost–microbe interaction mechanistic approach
Source: Royal Society of Chemistry journal article supplement (doi:10.1039/d2fo02060b), 2022-11-16
Supplement: d2fo02060b1.pdf [file d2fo02060b1.pdf]

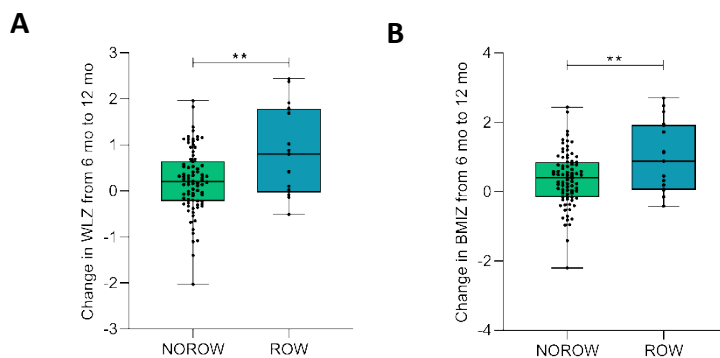

**Fig. S1.** Change WLZ (A) and BMIZ (B) from 6 mo to 12 mo. Children from ROW and NOROW groups. (n=100). Whiskers represented 5-95 percentile interval. \* p<0.05, \*\*p<0.01, \*\*\*p<0.001. ROW (Risk overweight) NOROW (No risk of overweight).

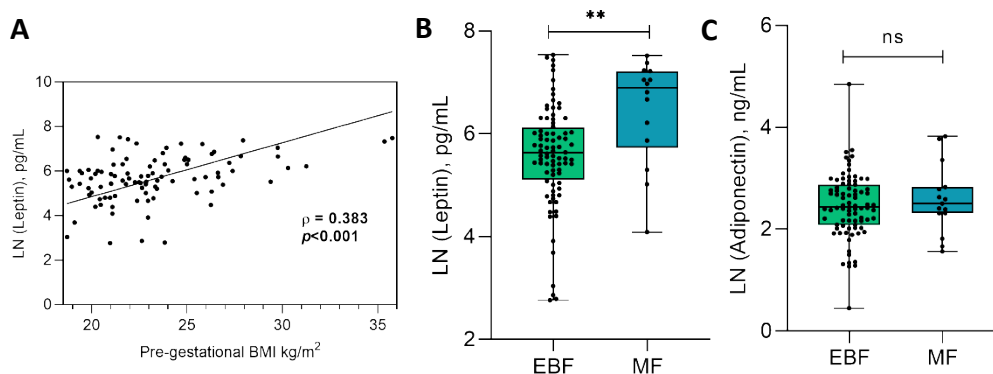

**Fig. S2.** BM composition in terms of adipokines (n=100). (A) Correlation of BM leptin and pre-gestational BMI. (B, C) Leptin and adiponectin concentration according to breastfeeding practices. Exclusive breastfeeding (EBF) and mixed feeding (MF) (BM and formula feeding). Whiskers represented 5–95 percentile intervals. Data was transformed by log<sub>10</sub> of the adipokines of each sample for plotting
