# Supplementary material for: Distinct breast milk microbiota, cytokine, and adipokine profiles are associated with infant growth at 12 months: anin vitrohost–microbe interaction mechanistic approach
Source: Royal Society of Chemistry journal article supplement (doi:10.1039/d2fo02060b), 2022-11-16
Supplement: d2fo02060b2.pdf [file d2fo02060b2.pdf]

**Table S1.** Cytokines and adipokines concentrations in breast milk

| Cytokines and adipokines (pg/mL) | Total (n=100)    |                   |       |
|----------------------------------|------------------|-------------------|-------|
|                                  | IQR              | pg/mL             | % det |
| IL-2                             | 0.00-0.00        | 0.65±2.05         | 11    |
| IL-4                             | 0.00-0.00        | 0.16±1.05         | 4     |
| IL-5                             | 0.00-0.00        | 0.18±0.67         | 8     |
| IL-6                             | 0.00-31.62       | 71.37±225.63      | 48    |
| IL-9                             | 0.00-0.00        | 0.20±1.13         | 5     |
| IL-10                            | 0.00-0.30        | 0.89±4.51         | 60    |
| IL-12                            | 0.00-0.10        | 0.30±2.31         | 27    |
| IL-13                            | 0.00-0.00        | 0.02±0.17         | 2     |
| IL-17                            | 0.00-0.00        | 0.17±0.72         | 7     |
| IL-18                            | 2.42-15.36       | 13.68±23.76       | 86    |
| IL-21                            | 0.38-5-05        | 12.39±39.08       | 78    |
| IL-22                            | 0.00-5.88        | 4.98±8.54         | 53    |
| IL-23                            | 0.00-0.00        | 0.71±1.99         | 14    |
| IL-1β                            | 0.00-1.63        | 9.33±50.18        | 39    |
| IFN_γ                            | 0.00-0.00        | 1.25±8.88         | 19    |
| GM-CSF                           | 0.00-0.00        | 0.10±0.82         | 2     |
| TNF_α                            | 1.66-2.44        | 2.38±2.50         | 99    |
| Leptin                           | 165.58-547.95    | 457.83±449.83     | 98    |
| Adiponectin                      | 7945.00-16810.49 | 14577.15±14107.66 | 99    |

Data shown are expressed as [IQR]. Detectability frequencies (% det). GM-CSF, Granulocyte Macrophage Colony-Stimulating Factor; IFN, Interferon; IL, Interleukin; TNF, tumor necrosis factor.

**Table S2.** Spearman correlation between Pre-gestational maternal BMI and breast milk microbiota and concentration of cytokines (n=100)

| Pre-gestational maternal BMI |        |       |
|------------------------------|--------|-------|
| Breast milk microbiota       | $\rho$ | $p$   |
| <i>Streptococcus</i>         | -0.08  | 0.427 |
| <i>Staphylococcus</i>        | 0.21   | 0.039 |
| <i>Acinetobacter</i>         | -0.04  | 0.729 |
| <i>Ralstonia</i>             | -0.15  | 0.139 |
| <i>Gemella</i>               | 0.01   | 0.909 |
| Breast milk cytokines        |        |       |
| IL-6                         | 0.30   | 0.904 |
| IL-18                        | -0.15  | 0.139 |
| IL-21                        | 0.06   | 0.565 |
| IL-1 $\beta$                 | -0.06  | 0.542 |
| IL-22                        | 0.20   | 0.048 |
| TNF $_{\alpha}$              | 0.30   | 0.003 |

IL, Interleukin; TNF, tumor necrosis. Significances are highlighted in bold.

**Table S3.** Relationship between breast milk microbiota, cytokines and BMIZ at 12 months (n=100)

| Breast milk microbiota and cytokines | Unadjusted analysis |              |              | Adjusted analysis* |              |              |
|--------------------------------------|---------------------|--------------|--------------|--------------------|--------------|--------------|
|                                      | $\beta$             | 95% CI       | <i>p</i>     | $\beta$            | 95% CI       | <i>p</i>     |
| Chao 1 index                         | 0.24                | 0.007-0.041  | <b>0.007</b> | 0.025              | 0.007-0.042  | <b>0.006</b> |
| <i>Streptococcus</i>                 | -0.008              | -0.016-0.000 | <b>0.044</b> | -0.008             | -0.016-0.000 | 0.057        |
| IL-10                                | -0.032              | -0.070-0.006 | 0.096        | -0.041             | -0.081-0.000 | <b>0.049</b> |
| IL-18                                | 0.010               | 0.003-0.018  | <b>0.008</b> | 0.011              | 0.003-0.018  | <b>0.006</b> |

Linear regression  $\beta$  coefficients for BM microbiota and cytokines predicting BMIZ at 12 months (\*adjusted for mode of birth, intrapartum antibiotic (ATB) and breastfeeding practices at 15 days).  $p < 0.05$  was considered statistically significant. CI: confidence interval, IL: interleukin. Significances are highlighted in bold.

**Table S4.** The IL-6 gene expression in MCF-7 (n=20)

| Condition     | Relative expression<br>(to ACTB gene) | 95% CI         | <i>p</i>     |
|---------------|---------------------------------------|----------------|--------------|
| Control-NOROW | 0.908                                 | 0.116 - 75.521 | 0.852        |
| Control-ROW   | 1.402                                 | 0.437 - 4.075  | 0.217        |
| NOROW-ROW     | 2.576                                 | 0.233 - 22.298 | <b>0.037</b> |

Data is presented as relative gene expression of IL-6 normalized to ACTB gene expression as house-keeping gene and the 95% confidence interval (CI). NOROW: No risk of overweight, ROW: Risk of overweight. \* $p < 0.05$  was considered statistically significant. Significances are highlighted in bold.
